# Supplementary material for: Oropharyngeal squamous cell carcinoma: radiomic machine-learning classifiers from multiparametric MR images for determination of HPV infection status
Source: PubMed Central journal article supplement (PMC7568530; doi:10.1038/s41598-020-74479-x), 2020-10-16
Supplement: 41598_2020_74479_MOESM1_ESM.pdf [file 41598_2020_74479_MOESM1_ESM.pdf]

**Oropharyngeal squamous cell carcinoma: radiomic machine-learning classifiers from multiparametric MR images for determination of HPV infection status**

Chong Hyun Suh, M.D.<sup>1†</sup>, Kyung Hwa Lee, M.D.<sup>2,3†</sup>, Young Jun Choi, M.D., Ph.D.<sup>1\*</sup>, Sae Rom Chung, M.D., Ph.D.<sup>1</sup>, Jung Hwan Baek, M.D., Ph.D.<sup>1</sup>, Jeong Hyun Lee, M.D., Ph.D.<sup>1</sup>, Jihye Yun, Ph.D.<sup>1</sup>, Sungwon Ham<sup>3</sup>, Namkug Kim, Ph.D.<sup>1,4\*</sup>

<sup>1</sup>Department of Radiology and Research Institute of Radiology, University of Ulsan College of Medicine, Asan Medical Center, Seoul, Republic of Korea

<sup>2</sup>Department of Medicine, University of Ulsan College of Medicine, Asan Medical Center, Seoul, Republic of Korea

<sup>3</sup>Department of Biomedical Engineering, Asan Medical Institute of Convergence Science and Technology, University of Ulsan College of Medicine, Asan Medical Center, Seoul, Republic of Korea

<sup>4</sup>Department of Convergence Medicine, University of Ulsan College of Medicine, Asan Medical Center, Seoul, Republic of Korea

†Both authors contributed equally. **(Co-first authors)**

\*Both authors contributed equally. **(Co-corresponding authors)**

**Supplementary Table 1. Selected features from various combinations of each sequence**

| Sequence      | Selected features                    |                                                                         |                                                                         |                                                                                                |
|---------------|--------------------------------------|-------------------------------------------------------------------------|-------------------------------------------------------------------------|------------------------------------------------------------------------------------------------|
| ADC           | ADC<br>ADC<br>ADC<br>ADC<br>ADC      | Wavelet LLL<br>Wavelet_HHH<br>Wavelet_HLH<br>Original<br>Original       | GLCM_dist_2<br>GLCM_dist_3<br>GLCM_dist_3<br>GLCM_dist_3<br>GLCM_dist_1 | Entropy_std<br>Correlation<br>Correlation<br>Entropy_std<br>Cluster Shade_std                  |
| T1WI          | T1<br>T1<br>T1<br>T1<br>T1           | Original<br>Wavelet_LHL<br>Wavelet_LHH<br>Wavelet_HLH<br>Wavelet_LLH    | GLCM_dist_1<br>GLCM_dist_3<br>Firstorder<br>GLCM_dist_2<br>GLCM_dist_3  | Autocorrelation_std<br>Correlation<br>Median<br>Correlation<br>Correlation                     |
| T2WI          | T2<br>T2<br>T2<br>T2<br>T2           | Wavelet_LLH<br>Wavelet_LLH<br>Wavelet_HLH<br>Wavelet_LHH<br>Wavelet_HLH | Firstorder<br>GLCM_dist_1<br>GLRLM<br>Firstorder<br>GLCM_dist_3         | Median<br>Cluster Prominence<br>HGRE<br>Skewness<br>Correlation                                |
| CE-T1WI       | T1CE<br>T1CE<br>T1CE<br>T1CE<br>T1CE | Wavelet_LLH<br>Wavelet_LHL<br>Wavelet_HLL<br>Wavelet_LLH<br>Original    | GLCM_dist_1<br>GLCM_dist_1<br>GLCM_dist_2<br>Firstorder<br>Firstorder   | Cluster Shade_std<br>Cluster Prominence<br>Cluster Prominence_std<br>Max<br>Range Cover        |
| ADC+T1WI      | ADC<br>T1<br>ADC<br>ADC<br>ADC       | Wavelet LLL<br>Original<br>Wavelet_HHH<br>Wavelet_HLH<br>Wavelet_LLH    | GLCM_dist_2<br>GLCM_dist_1<br>GLCM_dist_3<br>GLCM_dist_2<br>GLCM_dist_1 | Entropy_std<br>Autocorrelation_std<br>Correlation<br>Correlation_std<br>Homogeneity1_std       |
| ADC+T2WI      | ADC<br>ADC<br>ADC<br>ADC<br>T2       | Wavelet LLL<br>Wavelet_LLH<br>Wavelet_HLH<br>Original<br>Wavelet_HLH    | GLCM_dist_2<br>GLCM_dist_1<br>GLCM_dist_2<br>GLCM_dist_3<br>GLRLM       | Entropy_std<br>Homogeneity1_std<br>Correlation_std<br>Entropy_std<br>HGRE                      |
| ADC+CE-T1WI   | ADC<br>ADC<br>ADC<br>ADC<br>ADC      | Wavelet LLL<br>Wavelet_HLH<br>Wavelet_LLH<br>Wavelet_HLH<br>Original    | GLCM_dist_2<br>GLCM_dist_2<br>GLCM_dist_1<br>GLCM_dist_2<br>GLCM_dist_3 | Entropy_std<br>Correlation_std<br>Homogeneity1_std<br>Correlation_std<br>Entropy_std           |
| T1WI+T2WI     | T1<br>T1<br>T2<br>T1<br>T1           | Original<br>Wavelet_LHL<br>Wavelet_LLH<br>Wavelet_LLH<br>Original       | GLCM_dist_1<br>GLCM_dist_3<br>GLCM_dist_1<br>GLCM_dist_3<br>GLCM_dist_1 | Autocorrelation_std<br>Correlation<br>Cluster Prominence_std<br>Correlation<br>Sum average_std |
| T1WI+CE-T1WI  | T1<br>T1<br>T1<br>T1<br>T1           | Original<br>Wavelet_LHL<br>Wavelet_LLH<br>Original<br>Wavelet_HHL       | GLCM_dist_1<br>GLCM_dist_3<br>GLCM_dist_3<br>GLRLM<br>GLCM_dist_1       | Autocorrelation_std<br>Correlation<br>Correlation<br>GLN<br>Correlation                        |
| T2WI+CE-T1WI  | T1CE<br>T2<br>T2<br>T1CE<br>T1CE     | Wavelet_LLH<br>Wavelet_HLH<br>Original<br>Wavelet_LHH<br>Wavelet_LHL    | GLCM_dist_1<br>GLRLM<br>Firstorder<br>GLCM_dist_1<br>GLCM_dist_1        | Cluster Shade_std<br>HGRE<br>Max<br>Cluster Prominence<br>Cluster Prominence                   |
| ADC+T1WI+T2WI | ADC<br>T1<br>ADC<br>ADC<br>ADC       | Wavelet LLL<br>Original<br>Wavelet_HLH<br>Wavelet_LLH<br>Wavelet_HHH    | GLCM_dist_2<br>GLCM_dist_1<br>GLCM_dist_2<br>GLCM_dist_1<br>GLCM_dist_3 | Entropy_std<br>Autocorrelation_std<br>Correlation_std<br>Homogeneity1_std<br>Correlation       |

|                    |     |             |             |                     |
|--------------------|-----|-------------|-------------|---------------------|
| ADC+T1WI+CE-T1WI   | ADC | Wavelet_LLL | GLCM_dist_2 | Entropy_std         |
|                    | T1  | Original    | GLCM_dist_1 | Autocorrelation_std |
|                    | ADC | Wavelet_HLH | GLCM_dist_2 | Correlation_std     |
|                    | ADC | Wavelet_LLH | GLCM_dist_1 | Homogeneity1_std    |
|                    | ADC | Wavelet_HHH | GLCM_dist_3 | Correlation         |
| ADC+T2WI+CE-T1WI   | ADC | Wavelet_LLL | GLCM_dist_2 | Entropy_std         |
|                    | ADC | Wavelet_LLH | GLCM_dist_1 | Homogeneity1_std    |
|                    | ADC | Wavelet_HLH | GLCM_dist_2 | Correlation_std     |
|                    | ADC | Original    | GLCM_dist_3 | Entropy_std         |
|                    | ADC | Wavelet_HLH | GLCM_dist_3 | Correlation         |
| T1WI+T2WI+ CE-T1WI | T1  | Original    | GLCM_dist_1 | Autocorrelation_std |
|                    | T1  | Wavelet_LHL | GLCM_dist_3 | Correlation         |
|                    | T1  | Wavelet_LLH | GLCM_dist_3 | Correlation         |
|                    | T1  | Wavelet_HHL | GLCM_dist_1 | Correlation         |
|                    | T1  | Wavelet_LHL | Firstorder  | Range Cover         |

Abbreviations: ADC = apparent diffusion coefficient, T1WI = T1-weighted imaging, T2WI = fat-suppressed T2-weighted imaging, CE-T1WI = fat-suppressed contrast-enhanced T1-weighted imaging, GLCM = gray-level co-occurrence matrix, GLRLM = gray-level run-length matrix.

**Supplementary Table 2. Number of extracted features from each sequence**

| <b>Class</b> | <b>Original</b> | <b>3D Wavelets</b> | <b>Total</b> |
|--------------|-----------------|--------------------|--------------|
| First order  | 17              | 136                | 153          |
| GLCM_dist_1  | 46              | 368                | 414          |
| GLCM_dist_2  | 46              | 368                | 414          |
| GLCM_dist_3  | 46              | 368                | 414          |
| GLRLM        | 24              | 192                | 216          |
| Shpae/vol    | 7               | -                  | 7            |
| <b>Total</b> | <b>186</b>      | <b>1432</b>        | <b>1618</b>  |

Abbreviations: GLCM = gray-level co-occurrence matrix, GLRLM = gray-level run-length matrix

**Supplementary Table 3. Hyperparameters of each classifier**

| <b>Classifier</b>   | <b>Hyperparameters</b>                                                                                           |
|---------------------|------------------------------------------------------------------------------------------------------------------|
| Logistic regression | C = 0.01<br>penalty = l2<br>class_weight = balanced                                                              |
| Random forest       | criterion = gini<br>n_estimators = 300<br>max_features = 1<br>min_sample_split = 2<br>class_weight = balanced    |
| XG boost            | objective = binary:logistic<br>n_estimators = 1000<br>max_depth = 1<br>subsample = 0.4<br>colsample_bytree = 0.5 |

# Supplementary Figure 1: Box plots of selected features extracted from four magnetic resonance sequences

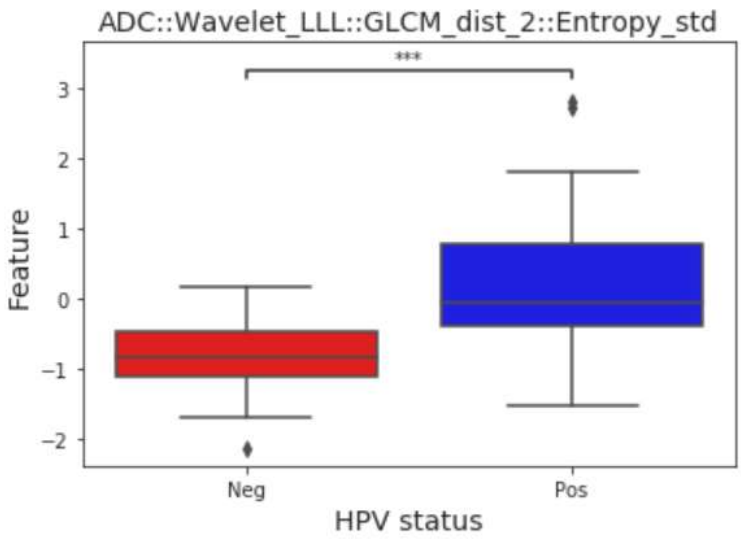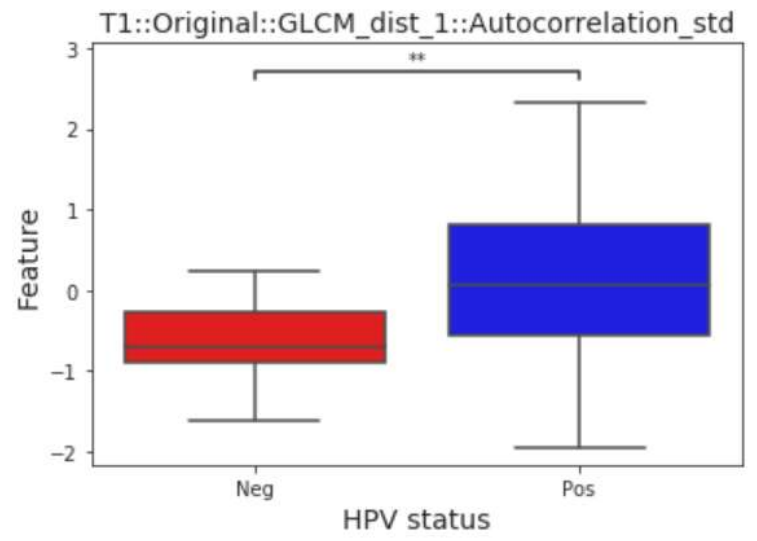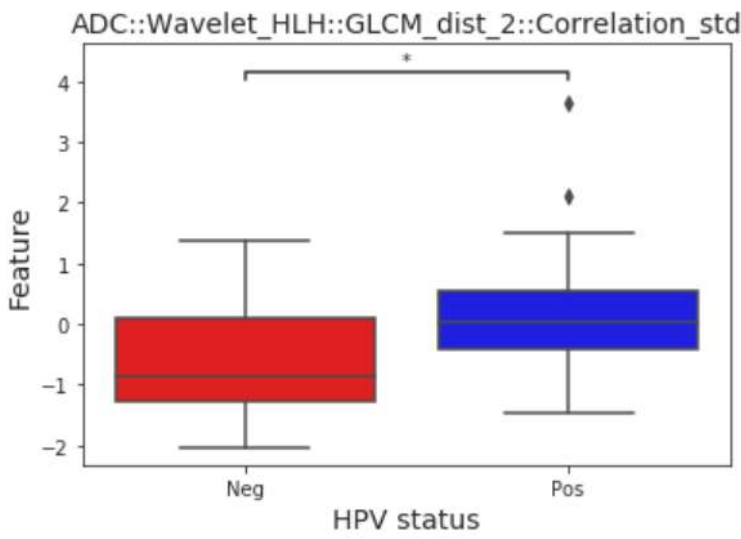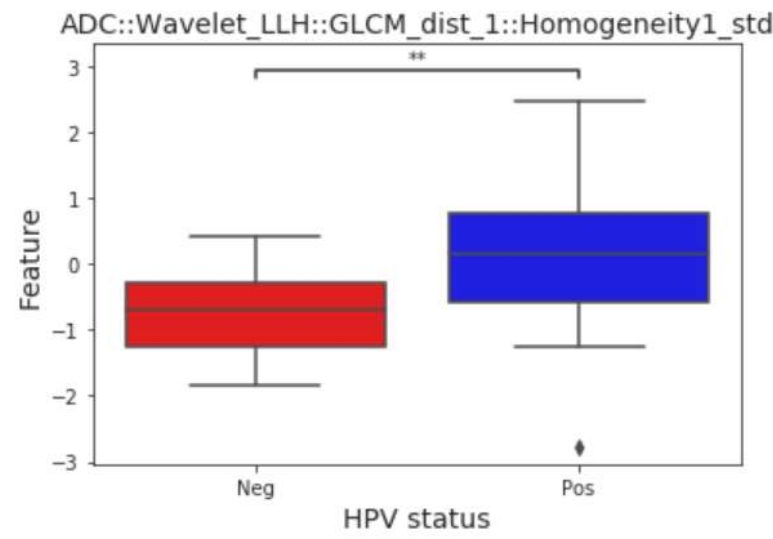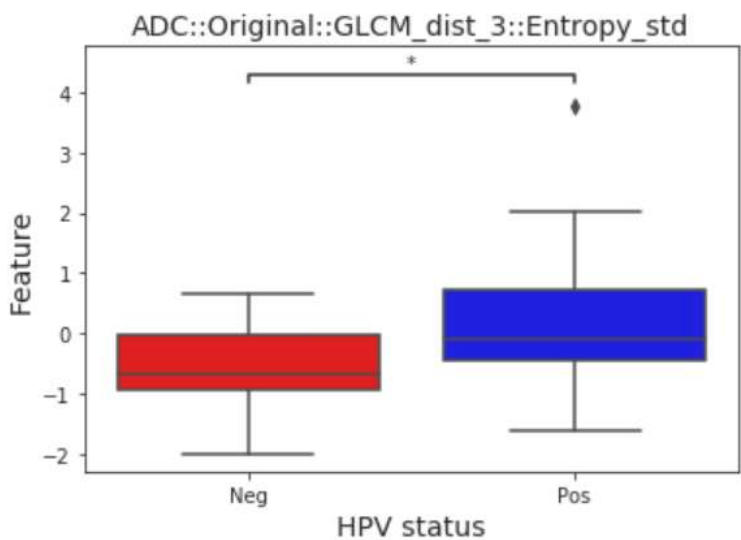

ns:  $0.05 < p \leq 1$ .  
 \*:  $0.01 < p \leq 0.05$   
 \*\*:  $0.001 < p \leq 0.01$   
 \*\*\*:  $0.0001 < p \leq 0.001$   
 \*\*\*\*:  $p \leq 0.0001$

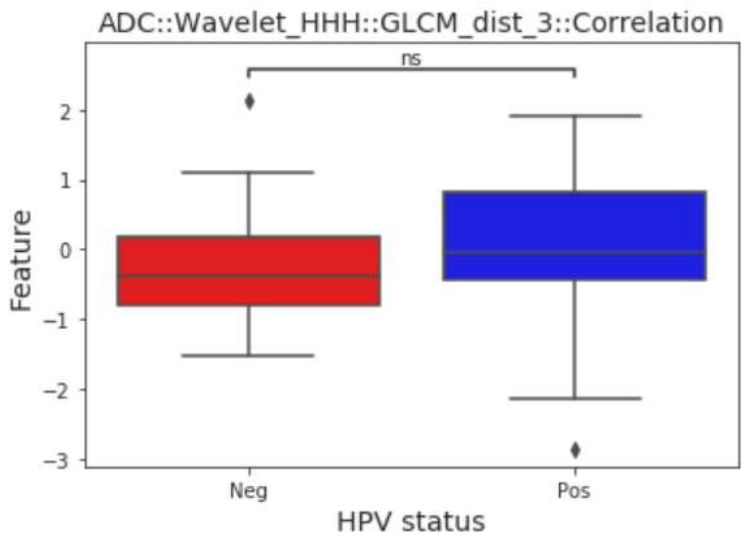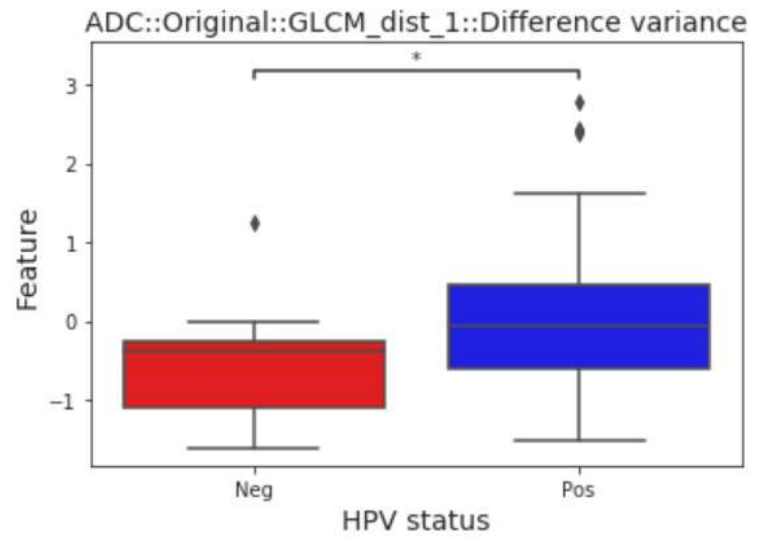

ns:  $0.05 < p \leq 1$ .  
 \*:  $0.01 < p \leq 0.05$   
 \*\*:  $0.001 < p \leq 0.01$   
 \*\*\*:  $0.0001 < p \leq 0.001$   
 \*\*\*\*:  $p \leq 0.0001$

**Supplementary Figure 2:** Box plots of selected features extracted from ADC map of tumor (T) mask and lymph node (N) mask. (a) Features from T mask. (b) Features from N mask

**a.**

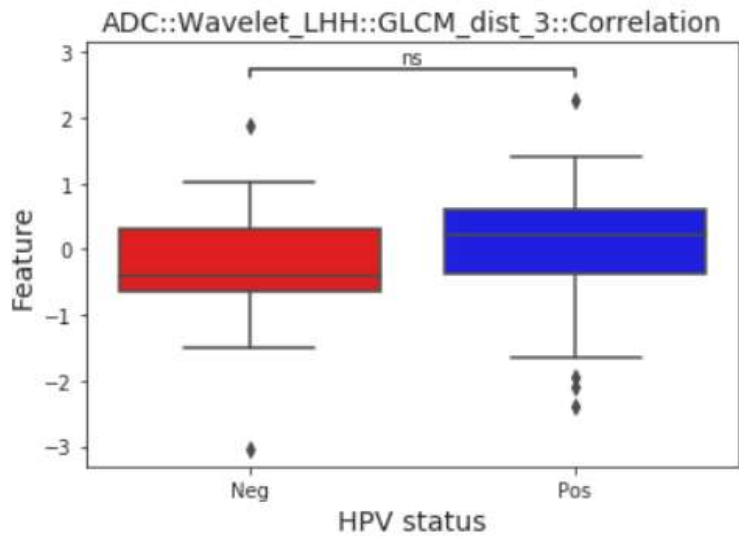

**b.**

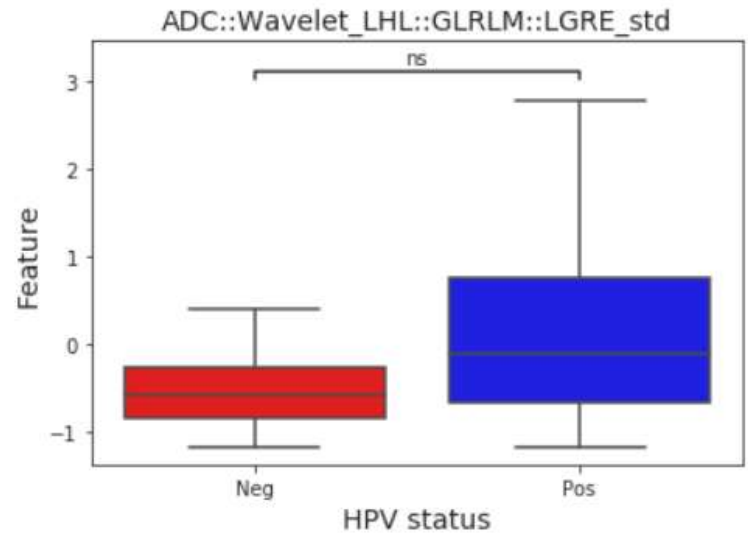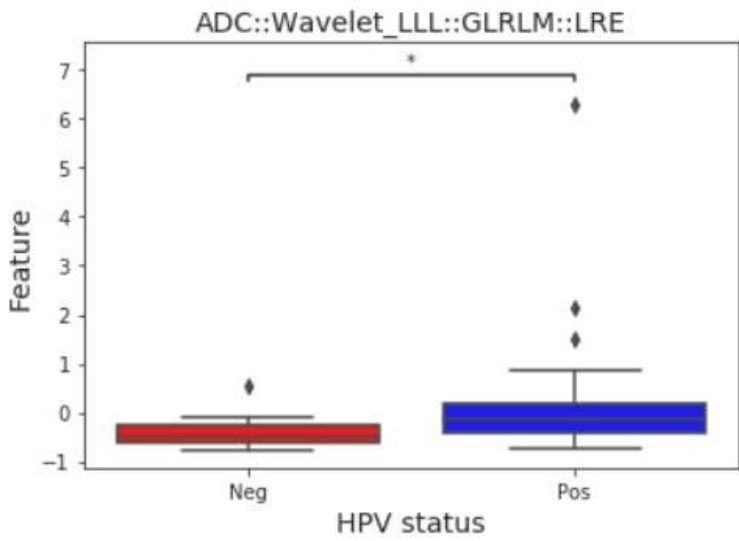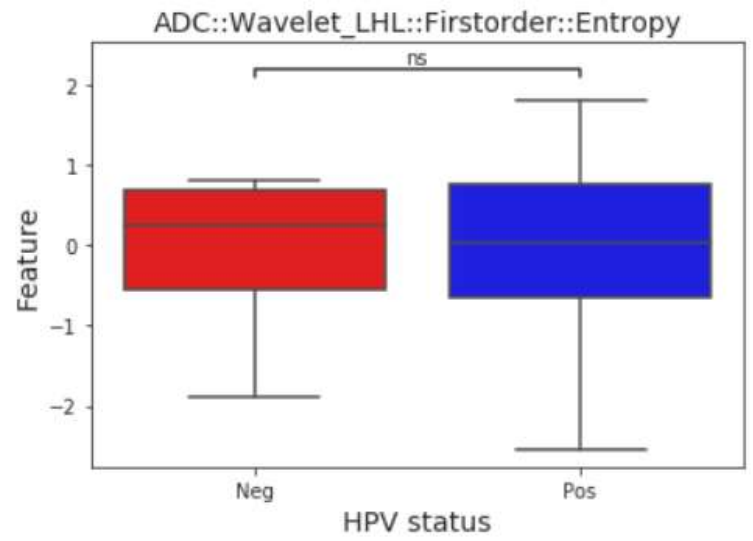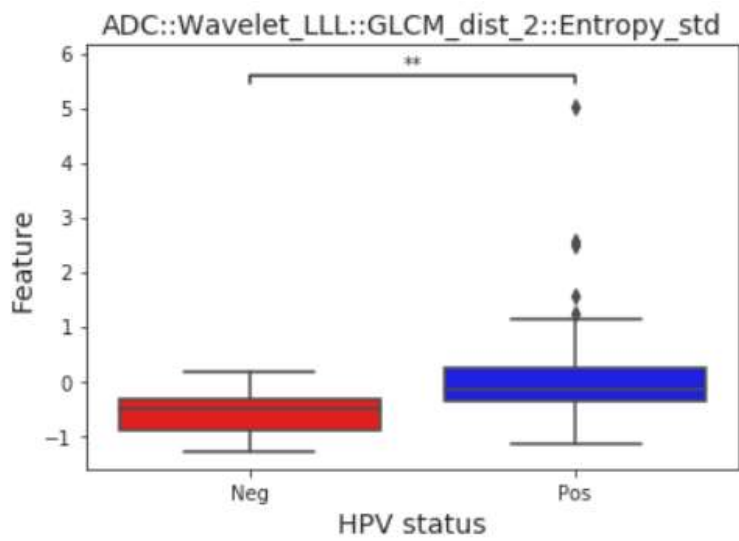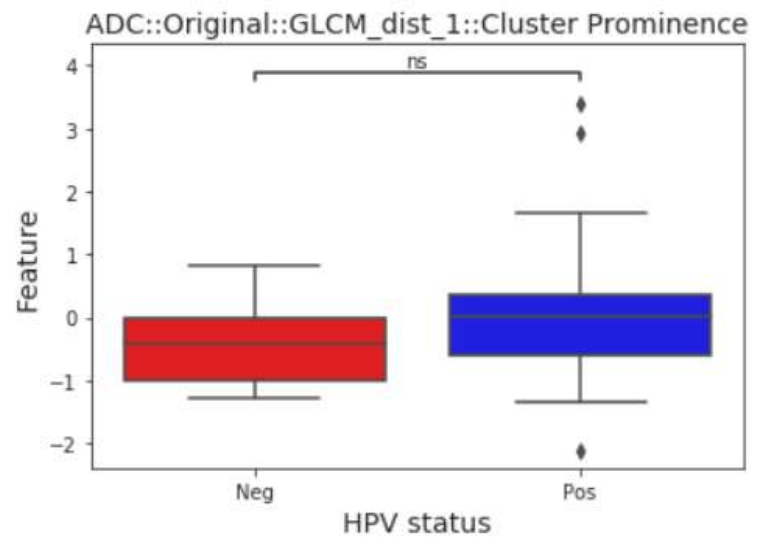



a.

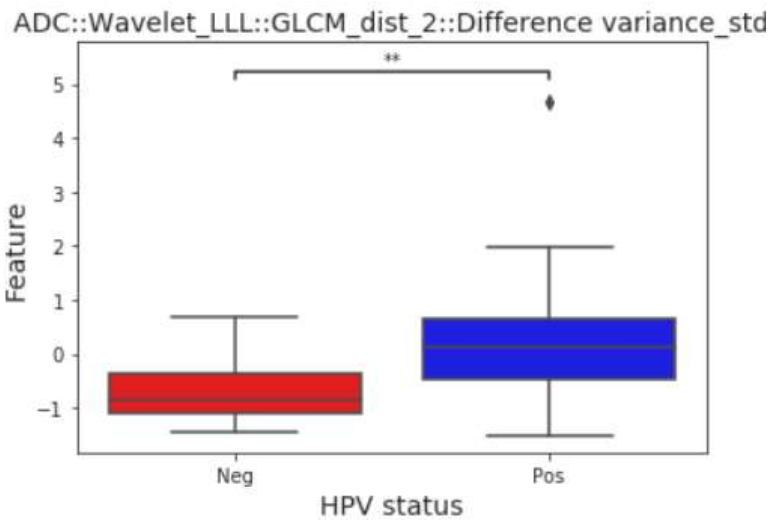

b.

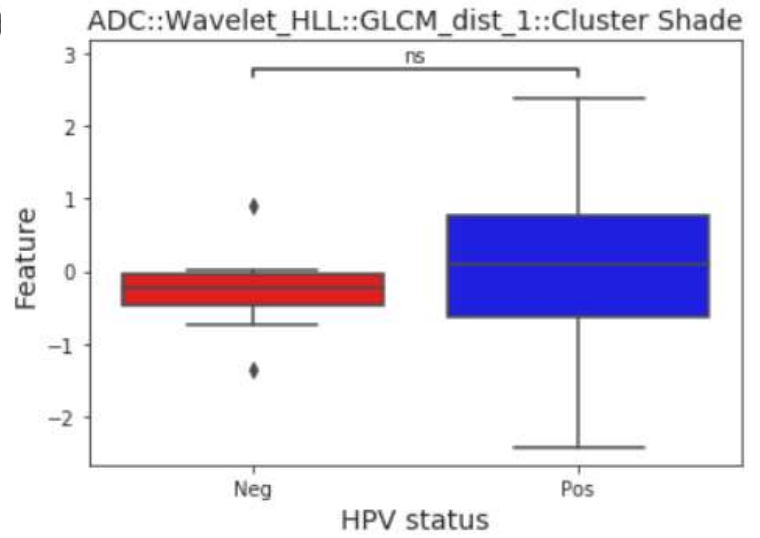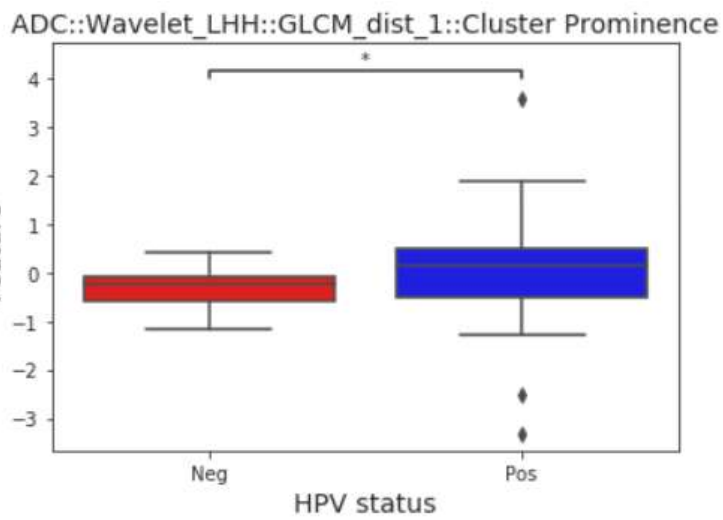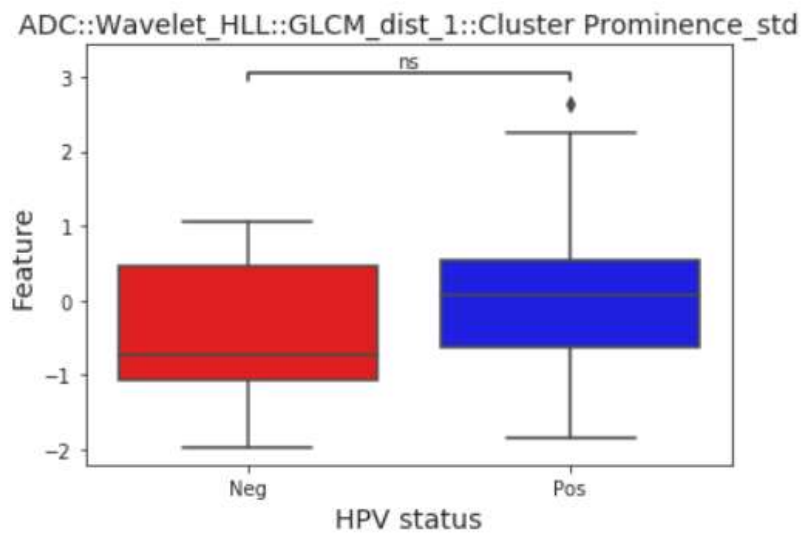

ns:  $0.05 < p \leq 1$ .

\*:  $0.01 < p \leq 0.05$

\*\*:  $0.001 < p \leq 0.01$

\*\*\*:  $0.0001 < p \leq 0.001$

\*\*\*\*:  $p \leq 0.0001$
